# Supplementary material for: MicroRNA-26a-3p rescues depression-like behaviors in male rats via preventing hippocampal neuronal anomalies
Source: JCI journal article supplement (doi:10.1172/jci148853), 2021-07-06
Supplement: sd1 [file 1]

## Supplementary material

### **MicroRNA-26a-3p rescues depression-like behaviors in male rats via preventing hippocampal neuronal anomalies**

Ye Li <sup>1</sup>, Cuiqin Fan<sup>1</sup>, Liyan Wang<sup>2</sup>, Tian Lan<sup>1</sup>, Rui Gao<sup>3</sup>, Wenjing Wang<sup>1</sup>, Shu Yan

Yu<sup>1, 4</sup> \*

## **Supplementary Methods and Materials**

### **Open field test (OPT)**

The open field test was used to measure the spontaneous locomotor activity as described previously (Walsh and Cummins 1976). Rats were individually placed in the center of a square box (100 x 100 x 40 cm) and were permitted unrestricted move throughout the arena for a 5-min session. The number of locomotor (segments crossed with the four limbs) and exploratory activities (number of rearings, consisting of standing on their hind limbs) were recorded by the observer blind to the treatment group.

### **Novel object recognition task**

The novel object recognition (NOR) task was used to test the non-spatial short-term memory as described previously (Ennaceur and Delacour 1988). Briefly, rats were individually placed in the empty chamber (60 x 40 x 40 cm) for a 1h habituation. On the next day, each rat was placed in the same chamber for a 10 min re-habituation period and then was placed in the chamber with two identical objects for 3min. After a 1 h interval, the rat was returned to the chamber with one of the object was replaced with a novel object for 3min test. Exploratory behavior was defined as sniffing, touching and moving vibrissae whilst directing the nose towards the object within the distance of 1 cm. The discrimination ratio of the novel from familiar object was presented as: novel/(novel + familiar time).

## Supplementary Figure 1

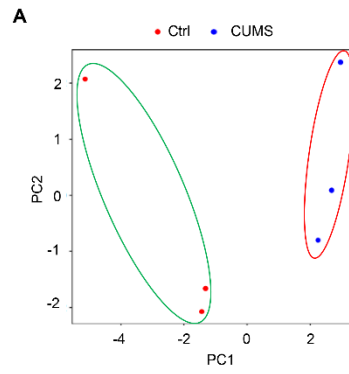

**Supplementary Figure 1.** The principal component analysis (PCA) plot showed the reproducibility of the RNA-seq experiments.

## Supplementary Figure 2

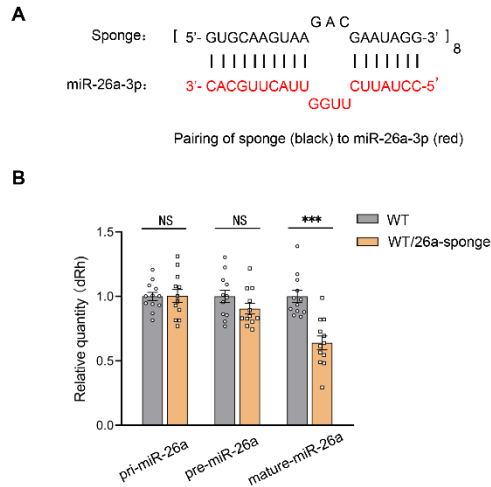

**Supplementary Figure 2. The miR-26a-sponge binds to the target miRNA through imperfect complementarity. (A)** The complementation between the sequence of sponge and miR-26a-3p shows that the sponge contains multiple imperfect miRNA binding sites. The sequence of miRNA sponge construct is: 5' GUGCAAGUAAGACGAAUAGG 3'. The scramble sequence of the control construct for the miR-26a-sponge is: 5' GCUUCCGUCAUUUCAUCUGU 3'. **(B)** Quantitative real-time PCR showed that the expression levels of pri-miR-26a and pre-miR-26a in DG regions have no changes after injection of AAV-miR-26a-sponge in DG region. N=12 rats per group from 3 independent biological replicate experiments. \*P<0.05, \*\*P<0.01, \*\*\*P<0.001 when compared to the WT group. Data were analyzed with Student's t test. WT, wide type.

### Supplementary Figure 3

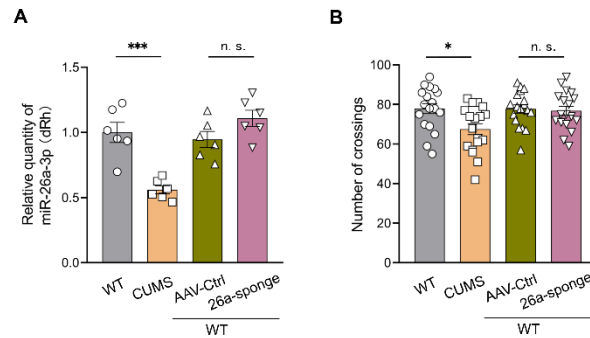

### Supplementary Figure 3. The effects of knock-down of miR-26a-3p within the DG

**on the locomotor behaviors in normal rats. (A)** Quantitative real-time PCR showed that the expression levels of miR-26a-3p in CA1 regions have no changes after injection of AAV-miR-26a-sponge in DG region. N=6 rats per group from 3 independent biological replicate experiments. **(B)** Knock-down of miR-26a-3p within the DG of normal rats has no effects on the locomotor behaviors in rats. Each column represents the mean  $\pm$  SEM from 16 to 18 animals per group. \* $p < 0.05$ , \*\* $P < 0.01$ , \*\*\* $P < 0.001$  when compared to the normal control, n.s. when compared to the AAV-control rats. Data were analyzed with a one-way ANOVA, followed by the Tukey's correction. WT, wide type; Ctrl, control.

## Supplementary Figure 4

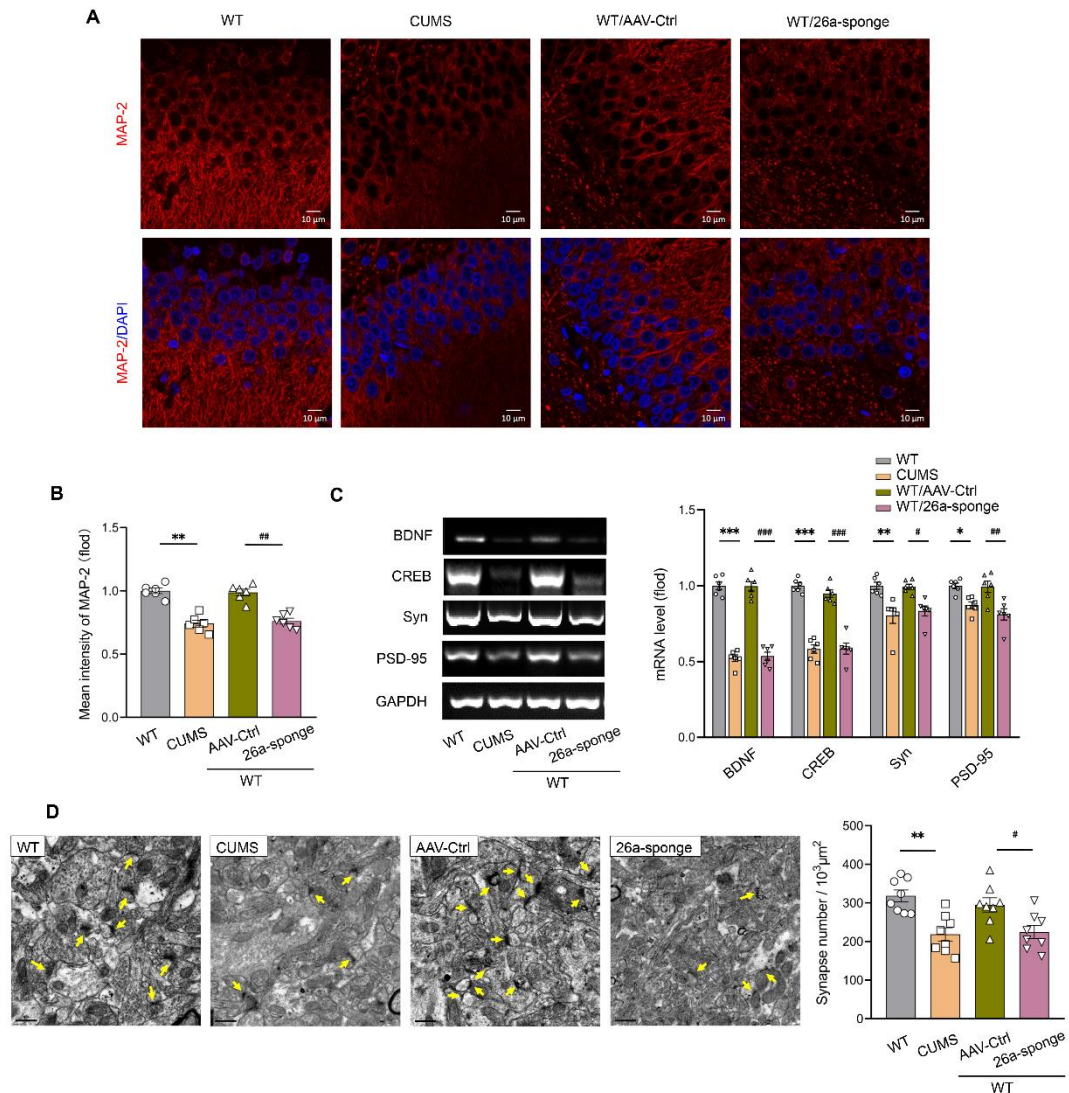

**Supplementary Figure 4. Knock-down of miR-26a-3p within the DG of normal rats induced dysregulation of neuroplasticity.** (A, B) Representative confocal microscopic images showing expressions of MAP-2 within the DG of different groups. Scale bar = 10 μm. N=6 rats per group and at least 4-6 images from 1 animal. (C) Knock-down of miR-26a-3p decreased mRNA levels of neuroplasticity-related mediators in the DG. N=6 rats per group from 3 independent biological replicate experiments. (D) Representative electronic micrographs and summary of data showing synapse densities

within the DG of different groups. Scale bar = 500nm. N = 8 rats per group and at least 20 micrographs from 1 animal. electron microscope and immunofluorescence were repeated at least 3 times and quantitation was done for representative samples from each group. Data are presented as the means  $\pm$  SEM. \*P<0.05, \*\*P<0.01, \*\*\*P<0.001 vs. WT; # P<0.05, ## P<0.01, ### P<0.01 vs. AAV-control (WT+ AAV-control) by ANOVA with Tukey's post hoc correction. WT, wide type; Ctrl, control.

## Supplementary Figure 5

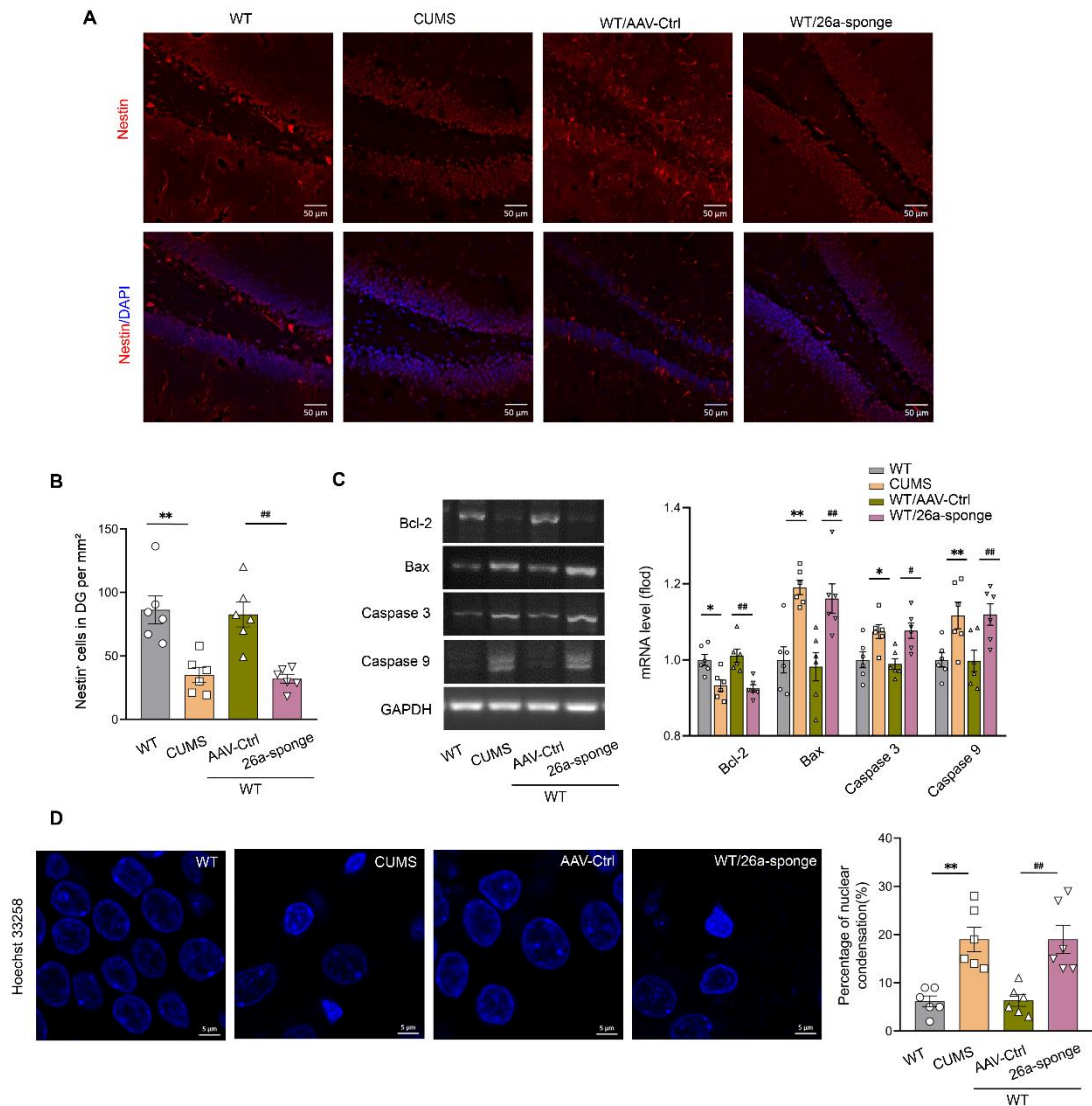

**Supplementary Figure 5. Knock-down of miR-26a-3p within the DG of normal rats induced neuronal apoptosis. (A, B)** Representative confocal microscopic images showing expressions of Nestin within the DG of different groups. Scale bar = 10 $\mu$ m. N=6 rats per group and at least 4-6 images from 1 animal. **(C)** Knock-down of miR-26a-3p increased mRNA levels of pro-apoptotic factors in the DG. N=6 rats per group from 3 independent biological replicate experiments. **(D)** Representative Hoechst images of 33258 staining and summary of data showing nuclear staining in the DG of



different groups. Scale bar = 5 $\mu$ m. N = 6 rats per group and at least 4-6 images from 1 animal. Immunofluorescence were repeated at least 3 times and quantitation was done for representative samples from each group. Data are presented as the means  $\pm$  SEM. \*P<0.05, \*\*P<0.01 vs. WT; #P<0.05, ##P<0.01 vs. AAV-control (WT+ AAV-control) by ANOVA with Tukey post hoc correction. WT, wide type; Ctrl, control.

## Supplementary Figure 6

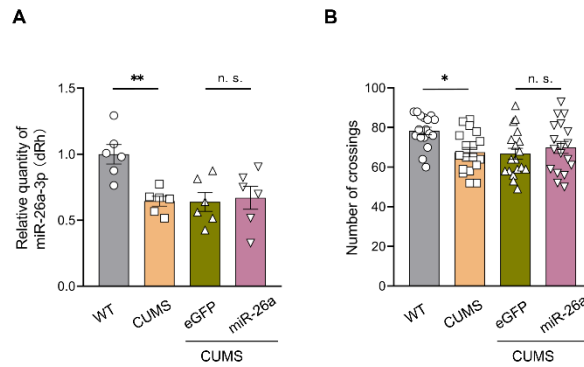

**Supplementary Figure 6. Overexpression of miR-26a-3p in the DG of CUMS rat on has no effects on the locomotor behaviors of rats.** (A) Quantitative real-time PCR showed that the expression levels of miR-26a-3p in CA1 regions have no changes after injection of AAV-miR-26a-sponge in DG region. N=6 rats per group from 3 independent biological replicate experiments. (B) Overexpression of miR-26a-3p within the DG of CUMS rats has no effects on the locomotor behaviors in rats. Data are presented as the means  $\pm$  SEM. Each column represents the mean  $\pm$  SEM from 16 to 18 animals per group. \*P<0.05, \*\*P<0.01 vs. WT; n.s. vs. eGFP control (CUMS+ AAV-eGFP) by ANOVA with Tukey post hoc correction. WT, wide type.

## Supplementary Figure 7

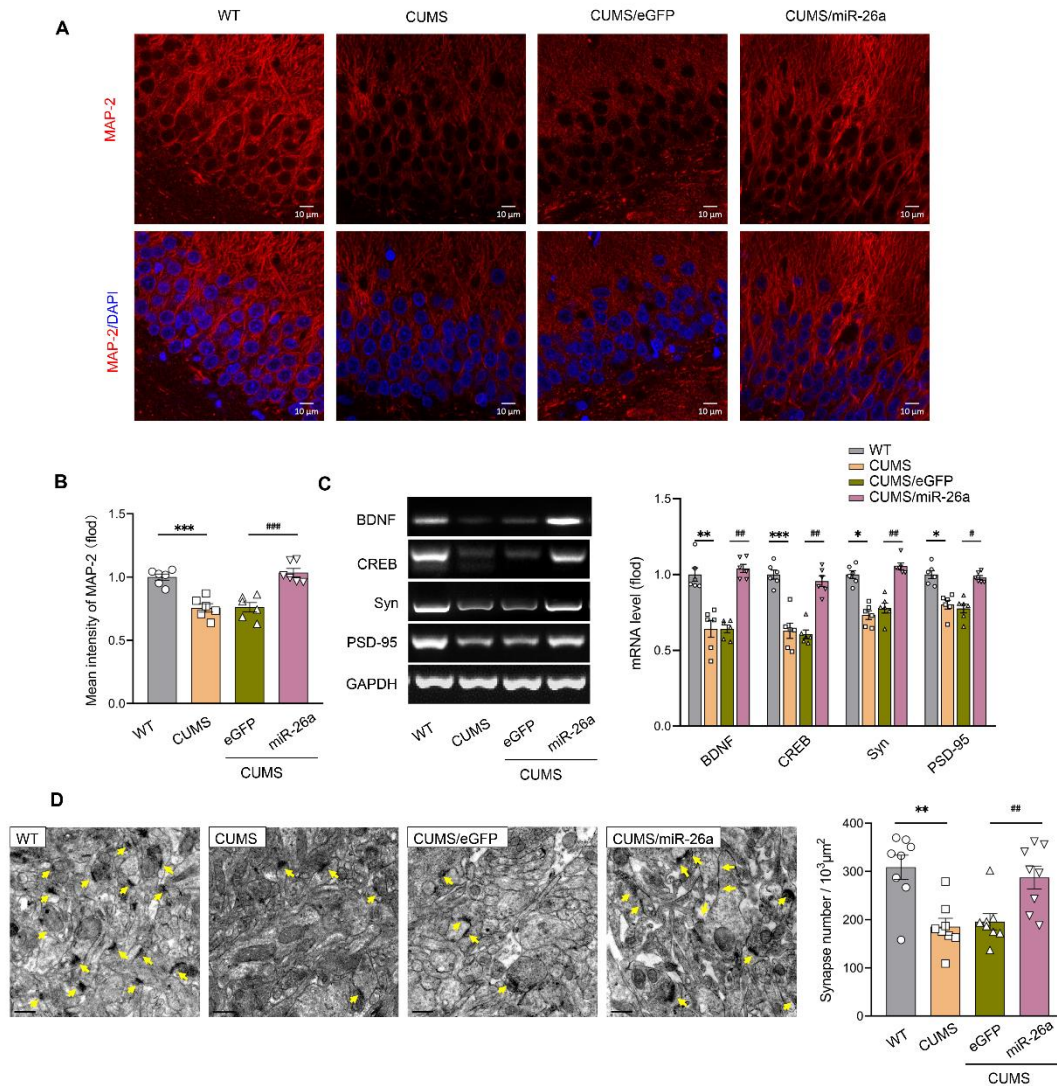

**Supplementary Figure 7. Overexpression of miR-26a-3p in the DG of CUMS rats restored the dysregulation of neuroplasticity resulting from CUMS exposure. (A, B) Representative confocal microscopic images showing the expression levels of MAP-2 within the DG. Scale bar = 10 μm. N=6 rats per group and at least 4-6 images from 1 animal. (C) Overexpression of miR-26a-3p increased mRNA levels of neuroplasticity-related mediators in CUMS rats. N=6 rats per group from 3 independent biological replicate experiments. (D) Representative electronic micrographs and summary of data**

showing synapse densities within the DG. Scale bar = 500 nm. N = 8 rats per group and at least 20 micrographs from 1 animal. Electron microscope and immunofluorescence were repeated at least 3 times and quantitation was done for representative samples from each group. Data are presented as the means  $\pm$  SEM. \*P<0.05, \*\*P<0.01, \*\*\*P<0.001 vs. WT; #P<0.05, ##P<0.01, ###P<0.001 vs. eGFP control (CUMS+ AAV-eGFP) by ANOVA with Tukey post hoc correction. WT, wide type.

## Supplementary Figure 8

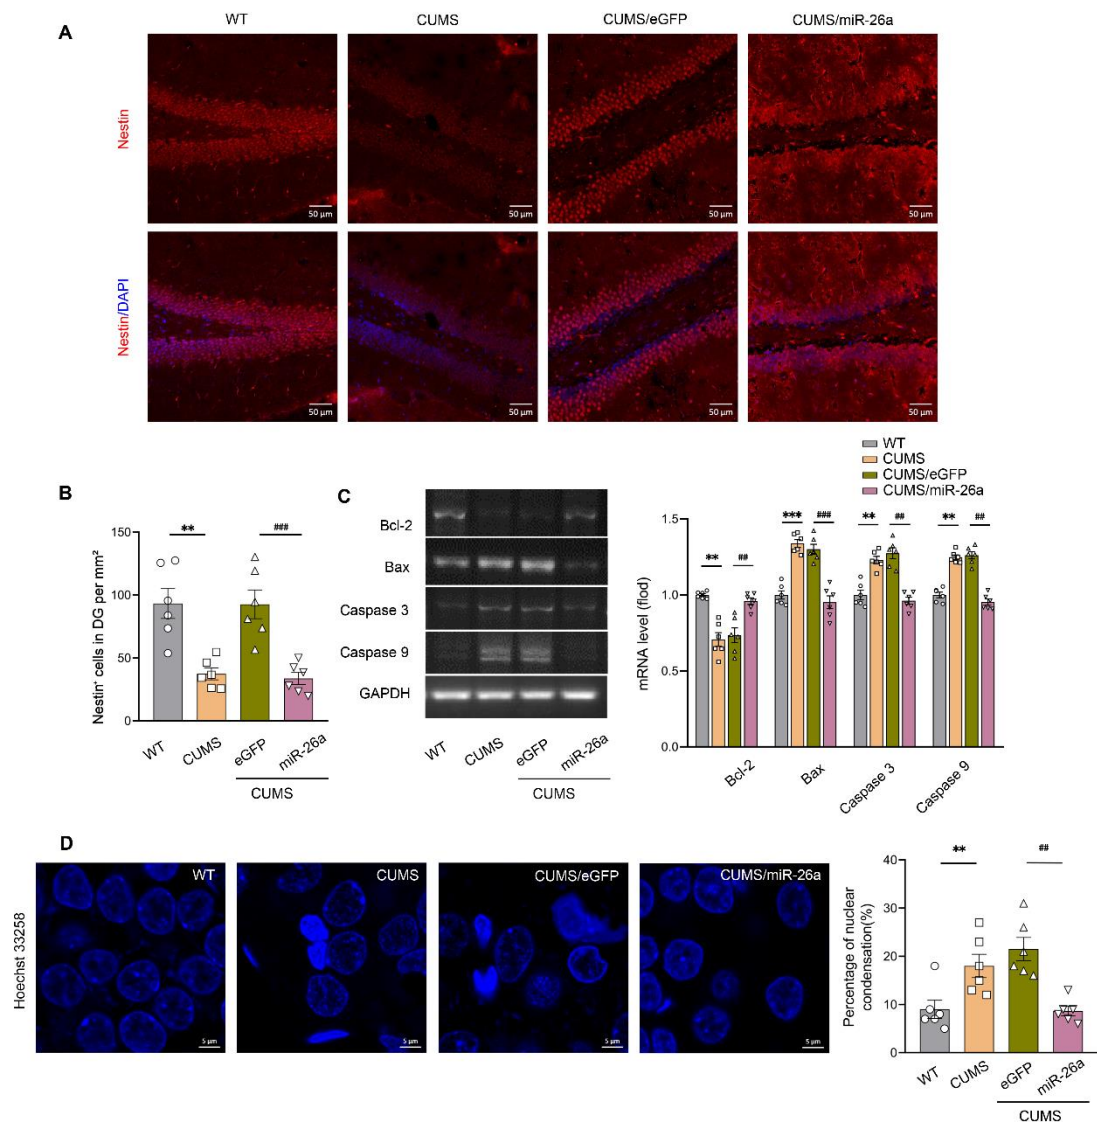

**Supplementary Figure 8. Overexpression of miR-26a-3p within the DG of CUMS rats suppressed neuronal apoptosis resulting from CUMS exposure.** (A, B) Representative confocal microscopic images showing expressions of nestin within the DG. Scale bar = 50 $\mu$ m. N=6 rats per group and at least 4-6 images from 1 animal. (C) Overexpression of miR-26a-3p decreased mRNA levels of apoptosis-related factors in CUMS rats. N=6 rats per group from 3 independent biological replicate experiments. (D) Representative images of Hoechst 33258 staining and summary of data showing

nuclear staining in the DG. Scale bar = 5 $\mu$ m. N = 6 rats per group and at least 4-6 images from 1 animal. Immunofluorescence were repeated at least 3 times and quantitation was done for representative samples from each group. Data are presented as the means  $\pm$  SEM. \*P<0.05, \*\*P<0.01, \*\*\*P<0.001 vs. WT; # P<0.05, ##P<0.01, ###P<0.01 vs. eGFP control (CUMS+ AAV-eGFP) by ANOVA with Tukey post hoc correction. WT, wide type.

**Supplemental Table 1.** PCR primers used in this study

| <i>Gene</i> | <i>Forward (5'→3')</i>      | <i>Reverse (5'→3')</i>      |
|-------------|-----------------------------|-----------------------------|
| BDNF        | AATAATGTCTGACCCAGTGC        | GTCACATTGTTGTCACGCTCC       |
| CREB        | GCAGTGACTIONGAGGAGCTTGT     | ACTCTGCTGGTTGTCTGCTC        |
| SYN         | GTGTGGCTTAAACACAGCGG        | TGCACCCTCTCAAACCTCCAC       |
| PSD-95      | GTTGCAGGTGAATGGAACAGAG      | CCTCCCGAACATCCACTTCAT       |
| Bcl-2       | GGA TCC AGG ATA ACG GAG GC  | ATG CAC CCA GAG TGA TGC AG  |
| Bax         | TCT TCA AAC TGC TGG GCC ATT | CTT GTC ACC TGC CTG ACT GCT |
| Caspase3    | GGA GCT TGG AAC GCG AAG AA  | ACA CAA GCC CAT TTC AGG GT  |
| Caspase9    | CAA GAA GAG CGG TTC CTG GT  | CAG AAA CAG CAT TGG CGA CC  |
| GAPDH       | AGT GCC AGC CTC GTC TCA TA  | GGT AAC CAG GCG TCC GAT AC  |

**KEY RESOURCES TABLE**

| REAGENT or RESOURCE                      | SOURCE                    | IDENTIFIER                    |
|------------------------------------------|---------------------------|-------------------------------|
| Antibodies                               |                           |                               |
| Rabbit polyclonal anti-cleaved Caspase-3 | Cell Signaling Technology | Cat#9661;<br>RRID:AB_2341188  |
| Rabbit monoclonal anti-BCL-2             | Cell Signaling Technology | Cat#2870;<br>RRID:AB_2290370  |
| Rabbit monoclonal anti-LC3A/B            | Cell Signaling Technology | Cat#12741;<br>RRID:AB_2617131 |
| Rabbit monoclonal anti-Beclin-1          | Cell Signaling Technology | Cat#3495;<br>RRID:AB_1903911  |
| Rabbit monoclonal anti-PARP              | Cell Signaling Technology | Cat#9532;<br>RRID:AB_659884   |
| Rabbit monoclonal anti-PSD-95            | Cell Signaling Technology | Cat#3450;<br>RRID:AB_2292883  |
| Rabbit monoclonal anti- $\beta$ -actin   | Cell Signaling Technology | Cat#4970;<br>RRID:AB_2223172  |
| Rabbit monoclonal anti-Synaptophysin     | Cell Signaling Technology | Cat#5461;<br>RRID:AB_10698743 |
| Rabbit monoclonal anti-CREB              | Cell Signaling Technology | Cat#9197;<br>RRID:AB_331277   |
| Rabbit monoclonal anti-SQSTM1/p62        | Cell Signaling Technology | Cat#23214;<br>RRID:AB_2798858 |
| Rabbit polyclonal anti-Phospho-Akt       | Cell Signaling Technology | Cat#9271;<br>RRID:AB_329825   |
| Rabbit polyclonal anti-Phospho-p53       | Cell Signaling Technology | Cat#9284;<br>RRID:AB_331464   |
| Rabbit polyclonal anti-PI3K              | Cell Signaling Technology | Cat#4292;<br>RRID:AB_329869   |



|                                                   |                           |                                     |
|---------------------------------------------------|---------------------------|-------------------------------------|
| Rabbit polyclonal anti-PTEN                       | Cell Signaling Technology | Cat#9552;<br>RRID:AB_10694066       |
| Rabbit monoclonal anti- Synaptotagmin-1           | Cell Signaling Technology | Cat#14558;<br>RRID:AB_2798510       |
| Mouse monoclonal Anti-Neurologin 1                | Abcam                     | Cat# ab186279;<br>RRID:AB_2801327   |
| Rabbit polyclonal anti-BDNF                       | SANTA                     | Cat# sc-546;<br>RRID:AB_630940      |
| Rabbit polyclonal anti-GAPDH                      | Proteintech Group         | Cat#10494-1-AP;<br>RRID: AB_2263076 |
| Rabbit polyclonal anti-BAX                        | Proteintech Group         | Cat#50599-2-Ig;<br>RRID:AB_2061561  |
| Rabbit polyclonal anti-Caspase9                   | Bioworld                  | Cat# AP0359                         |
| Goat polyclonal anti-Nestin                       | Thermofish                | Cat# PA5-47378<br>RRID:AB_2609217   |
| Rabbit polyclonal anti-PSD95                      | Proteintech Group         | Cat# 20665-1-AP                     |
| Rabbit monoclonal Synaptophysin                   | Cell Signaling Technology | Cat# 9020                           |
| Rabbit polyclonal anti-Doublecortin (DCX)         | Cell Signaling Technology | Cat# 4604                           |
| Rabbit polyclonal anti-MAP2                       | Cell Signaling Technology | Cat# 4542                           |
| DAPI                                              | Beyotime Biotechnology    | Cat# C1002                          |
| Rhodamine (TRITC)-conjugated Donkey anti-Goat IgG | Thermofish                | Cat# A-11058<br>RRID: AB_2534105    |
| Rhodamine (TRITC)-conjugated Goat anti-Rabbit IgG | Proteintech Group         | Cat# SA00013-4;                     |
| Fluorescein (FITC)-conjugated Goat anti-Mouse IgG | Proteintech Group         | Cat# SA00013-1;                     |

|                                                                                                        |                                                |                               |
|--------------------------------------------------------------------------------------------------------|------------------------------------------------|-------------------------------|
| Peroxidase-conjugated goat anti-rabbit IgG                                                             | Zhongshan Golden Bridge Biotechnology          | Cat#ZB-2301; RRID: AB_2747412 |
| Peroxidase-conjugated goat anti-mouse IgG                                                              | Zhongshan Golden Bridge Biotechnology          | Cat#ZB-2305; RRID: AB_2747415 |
| Chemicals, Peptides, and Recombinant Proteins                                                          |                                                |                               |
| AAV9-rno-mir-26a(43063-1)                                                                              | Shanghai Genechem                              | N/A                           |
| AAV9-rno-miR-26a-3p-sponge (43023-1)                                                                   | Shanghai Genechem                              | N/A                           |
| lipopolysaccharide (LPS)                                                                               | Sigma-Aldrich                                  | Cat# L2880                    |
| Hoechst 33258                                                                                          | Solarbio Biotechnology                         | Cat#C0031                     |
| TRizol                                                                                                 | Invitrogen                                     | Cat#15596018                  |
| Critical Commercial Assays                                                                             |                                                |                               |
| FD Rapid GolgiStain™ Kit                                                                               | FD Neuro-Technologies                          | Cat# PK401A                   |
| BeyoECL Plus (Ultra sensitive ECL chemiluminescence kit)                                               | Beyotime                                       | Cat# No.P0018S                |
| Immobilon Western (Chemiluminescent HRP Substrate)                                                     | MILLIPORE                                      | Cat# No.WBKLS0050             |
| Experimental Models: Organisms/Strains                                                                 |                                                |                               |
| Wistar rat                                                                                             | Shandong University Experimental Animal Centre | Custom developed              |
| Oligonucleotides                                                                                       |                                                |                               |
| Primers for BAX, BCL-2, Caspase 9, Caspase 3, PSD-95, CREB, BDNF, SYN, GAPDH, see Supplemental Table 1 | This paper                                     | N/A                           |
| Software and Algorithms                                                                                |                                                |                               |

|                  |                |                                                                                                                                                                                                                                   |
|------------------|----------------|-----------------------------------------------------------------------------------------------------------------------------------------------------------------------------------------------------------------------------------|
| ZEN lite         | Carl Zeiss     | <a href="https://www.zeiss.com/microscopy/int/downloads.html?vaURL=www.zeiss.com/microscopy/int/downloads/zen.html">https://www.zeiss.com/microscopy/int/downloads.html?vaURL=www.zeiss.com/microscopy/int/downloads/zen.html</a> |
| ImageJ           | NIH IMAGEJ     | <a href="https://imagej.nih.gov/ij/">https://imagej.nih.gov/ij/</a>                                                                                                                                                               |
| Graphpad prism 8 | Graphpad prism | <a href="https://www.graphpad.com/scientific-software/prism/">https://www.graphpad.com/scientific-software/prism/</a>                                                                                                             |
| Photoshop CC     | Adobe          | <a href="https://www.adobe.com/products/photoshop.html">https://www.adobe.com/products/photoshop.html</a>                                                                                                                         |
